# Supplementary material for: Sr(ii)-UPRM-5 titanium silicate framework thermally induced contraction: in situ high temperature XRD and 29Si MAS NMR
Source: Royal Society of Chemistry journal article supplement (doi:10.1039/c0dt01352h), 2011-01-01
Supplement: c0dt01352h.pdf [file c0dt01352h.pdf]

Electronic Supplementary Information for Dalton Transactions

**Supplementary Data**

Sr(II)-UPRM-5 Titanium Silicate Framework Thermally Induced Contraction:  
*In Situ* High Temperature XRD and  $^{29}\text{Si}$  MAS NMR

José N. Primera-Pedrozo<sup>a</sup>, Karen J. Guerrero-Medina<sup>a</sup>, Riqiang Fu<sup>b</sup>  
and Arturo J. Hernández-Maldonado<sup>a\*</sup>

<sup>a</sup>Department of Chemical Engineering, University of Puerto Rico-Mayagüez Campus  
Mayagüez, PR 00681-9000

<sup>b</sup>National High Magnetic Field Laboratory, Florida State University  
Tallahassee, FL 32310

\* To whom correspondence should be addressed:

Phone: 787-832-4040 x3748; Fax: 787-834-3655; E-mail: arturoj.hernandez@upr.edu

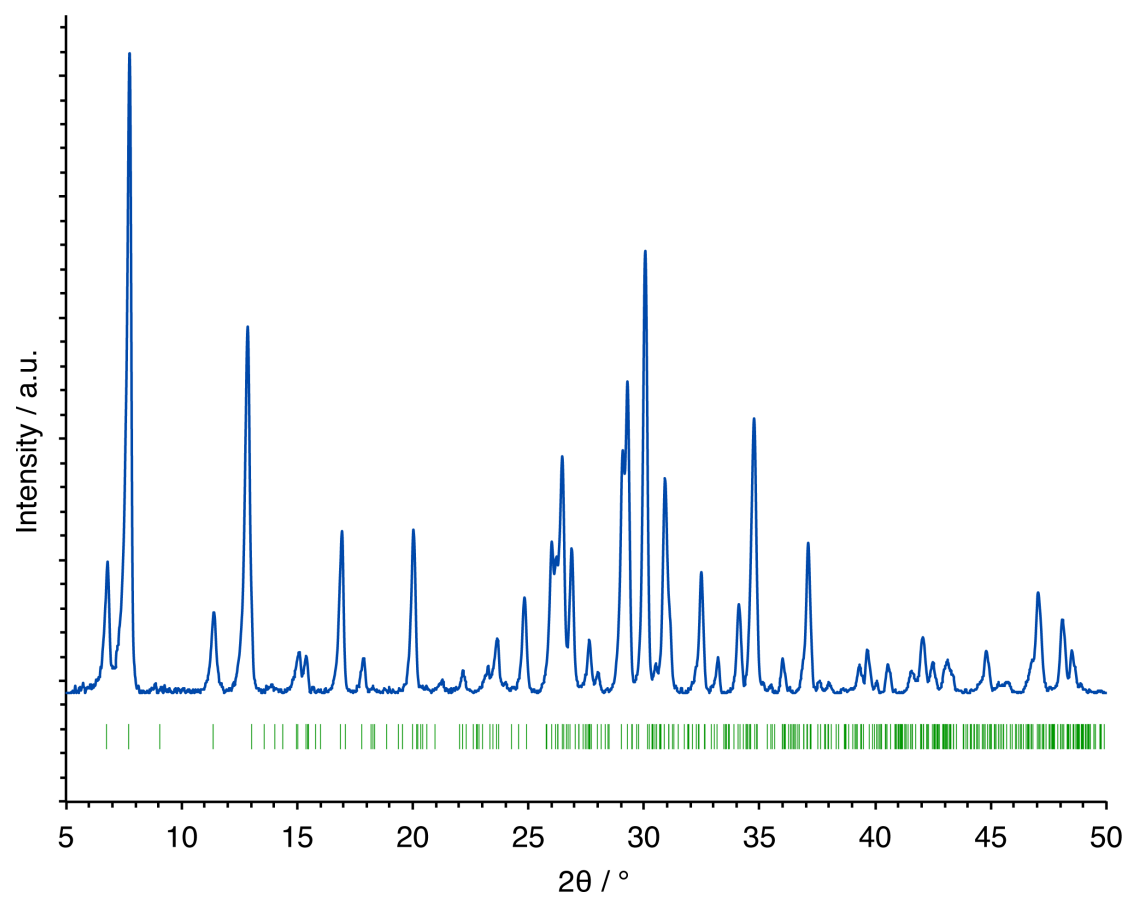

**Figure S1.** Experimental X-ray diffraction pattern for as-synthesized UPRM-5 and calculated reflections.

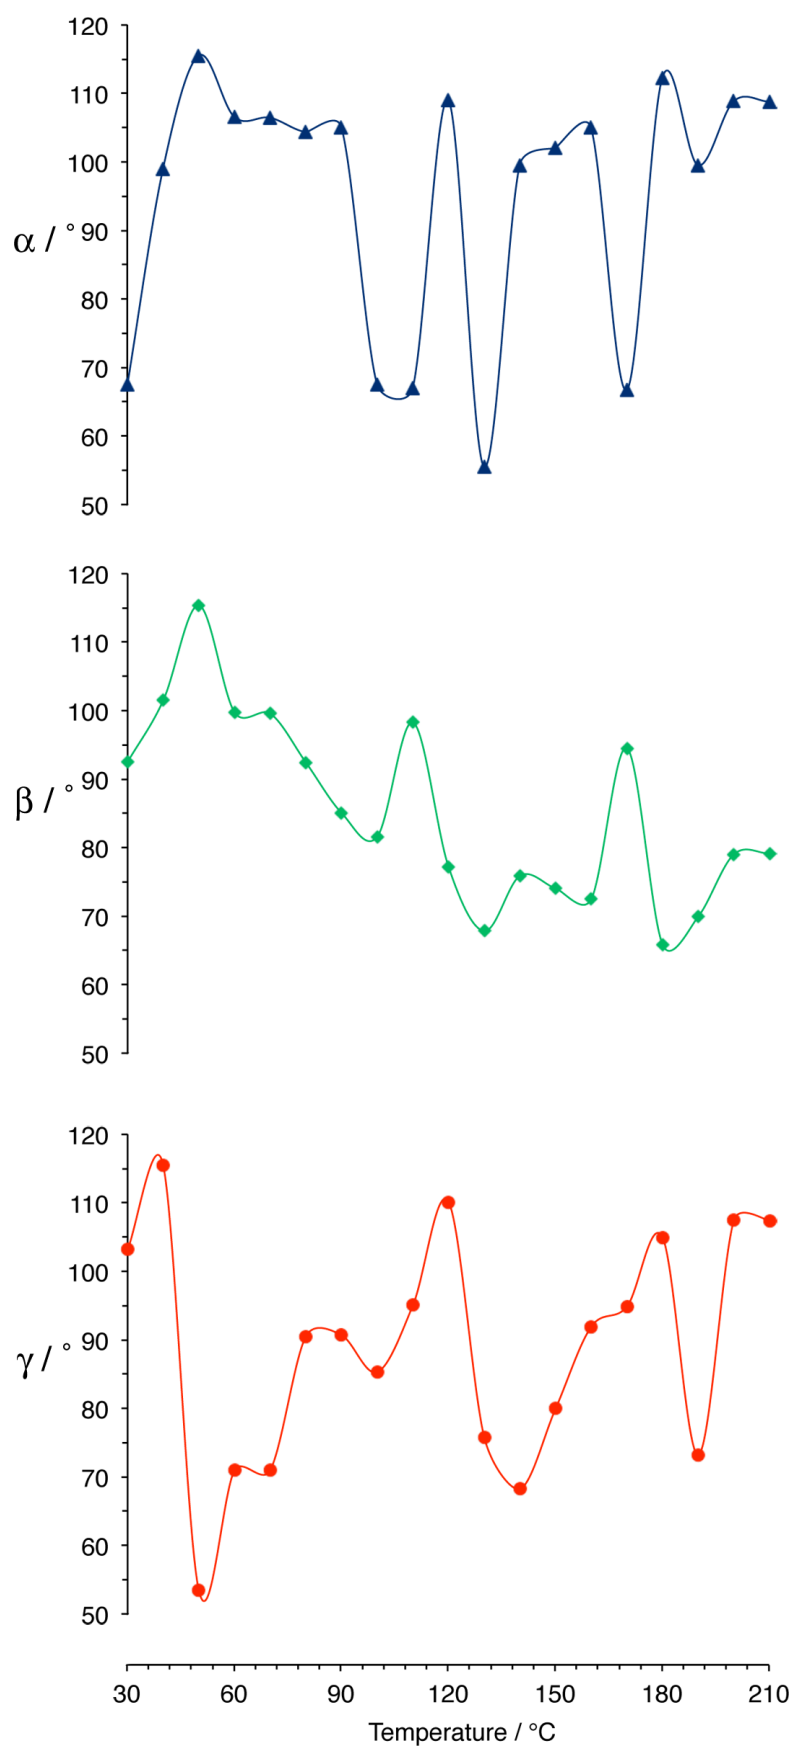

**Figure S2.** Unit cell lattice angles as a function of temperature.
